# Supplementary material for: Identifying Unintentional Medication Discrepancies at Admission among Elderly Inpatients in Vietnam
Source: Research Square preprint supplement (doi:10.21203/rs.3.rs-197019/v1), 2021-02-16
Supplement: Supplementary file 1 [file 59f25cb7d8d0922344f0973d.docx]

**Supplementary file**

**INTERVIEW GUIDE**

**Interviewing patients abour their medications**

Study: Identifying Unintentional Medication Discrepancies at Admission among Elderly Inpatients in Vietnam

Phuong Thi Xuan Dong1,3, Van Thi Thuy Pham1,2, Linh Thi Nguyen1, Thao Thi Nguyen1,2, Huong Thi Lien Nguyen1, Susan Hua3 and Shu Chuen Li3*

**Introduction**

My name is…………. and I am one of the pharmacists in the hospital.

I would like to have a chat with you about your medicines. One of my jobs is to make sure we have a full list of all the medications you were taking at home. So I’d like to know what medications you take, how much you take and how often you take them.

1. Do you normally take medicines at home (including tablets, liquids, inhalers, patches, injections, creams, eye drops, and so on)?

2. What is (are) the name(s) of these medication(s)?

3. Do you know how many different medicines you are taking?

4. How strong is the medication? How much of that medication do you take at a time?

5. How many times a day do you take it?

6. Do you have any medicines at home that you only take when you need them (instead of every day)?

7. Do you take any medicines not prescribed for you by your doctor (including over-the-counter medications that you can buy in a shop or pharmacy)?

8. What is (are) the name(s) of these medication(s)?

9. How strong is the medication (give an example of strength)? How much of that medication do you take at a time?

10. How many times a day do you take it?

11. Have you ever had an allergic reaction to any medication? What happened?

12. Have you ever had a side effect from any medicine? What happened?
